# Supplementary material for: Nirmatrelvir or Molnupiravir Use and Severe Outcomes From Omicron Infections
Source: PubMed Central journal article supplement (PMC10514733; doi:10.1001/jamanetworkopen.2023.35077), 2023-09-21
Supplement: jamanetwopen-e2335077-s001.pdf [file jamanetwopen-e2335077-s001.pdf]

## Supplemental Online Content

Lin DY, Abi Fadel F, Huang S, et al. Nirmatrelvir or molnupiravir use and severe outcomes from Omicron infections. *JAMA Netw Open*. 2023;6(9):e2335077. doi:10.1001/jamanetworkopen.2023.35077

- eFigure 1.** Outpatient Covid-19 Therapeutic Decision Tree at Cleveland Clinic
- eFigure 2.** Proportions of Patients Receiving Treatments Over Time
- eFigure 3.** Cumulative Incidence of Death After Omicron Infection by Treatments for Patients 65 Years of Age or Older
- eFigure 4.** Cumulative Incidence of Death After Omicron Infection by Treatments for Patients Less Than 65 Years of Age
- eFigure 5.** Estimates of Time-Varying Hazard Ratios for Time to Death in the Cox Regression Analysis of Nirmatrelvir Treatment
- eFigure 6.** Estimates of Time-Varying Hazard Ratios for Time to Death in the Cox Regression Analysis of Molnupiravir Treatment
- eTable 1.** ICD-10 Codes for the Underlying Conditions of Covid-19 Patients at High Risk of Progressing to Severe Disease
- eTable 2.** Categories of Comorbidities for Covid-19 Patients
- eTable 3.** Differences of Demographic and Clinical Characteristics Between Treated and Untreated Patients
- eTable 4.** Kaplan-Meier Estimates and 95% Confidence Intervals for the Cumulative Incidence of Death After Covid-19 Diagnosis
- eTable 5.** Adjusted Hazard Ratios of Hospitalization or Death After Omicron Infection for Treatments and Confounding Variables
- eTable 6.** Adjusted Hazard Ratios of Hospitalization or Death After Omicron Infection for Treatments by Subgroup

This supplemental material has been provided by the authors to give readers additional information about their work.

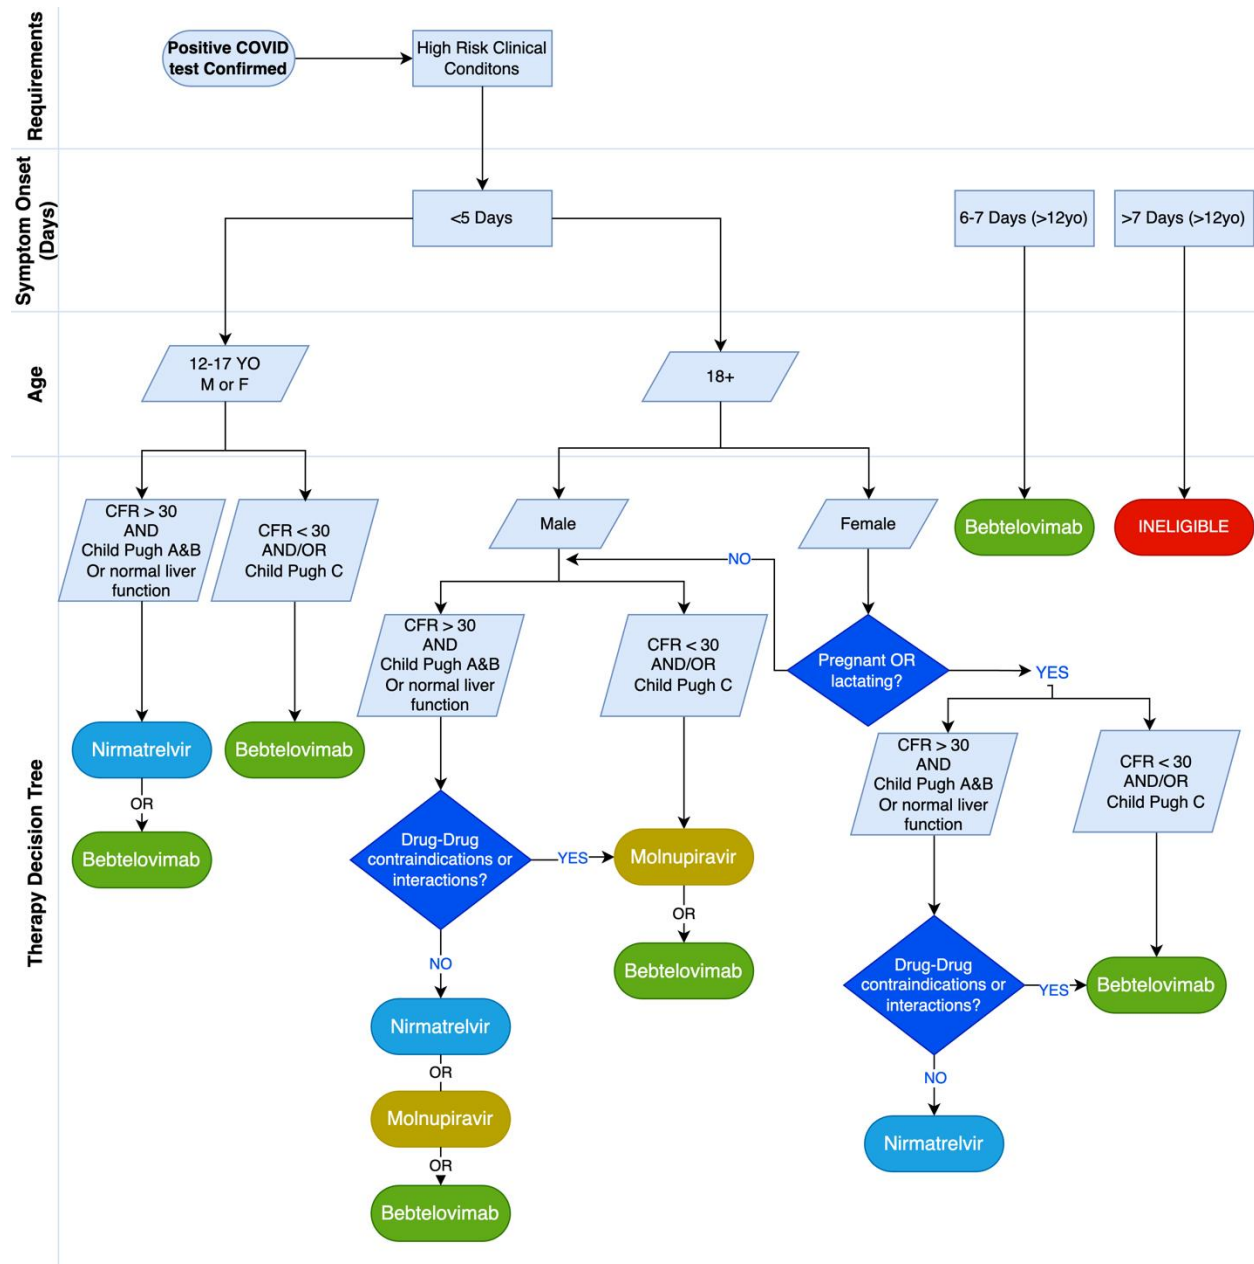

**eFigure 1. Outpatient Covid-19 Therapeutic Decision Tree at Cleveland Clinic.**

### A Nirmatrelvir

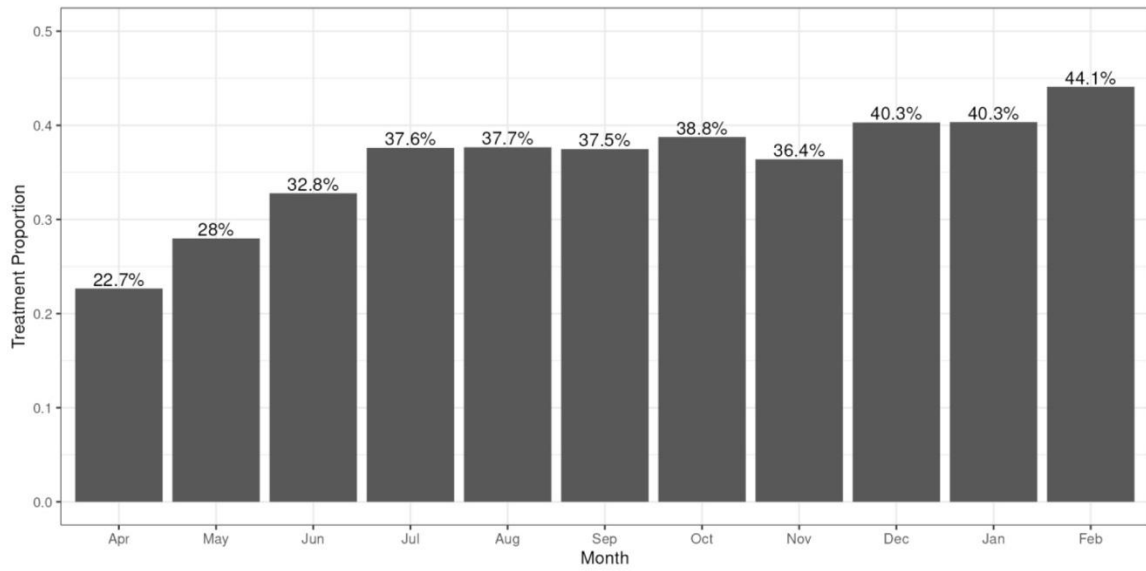

### B Molnupiravir

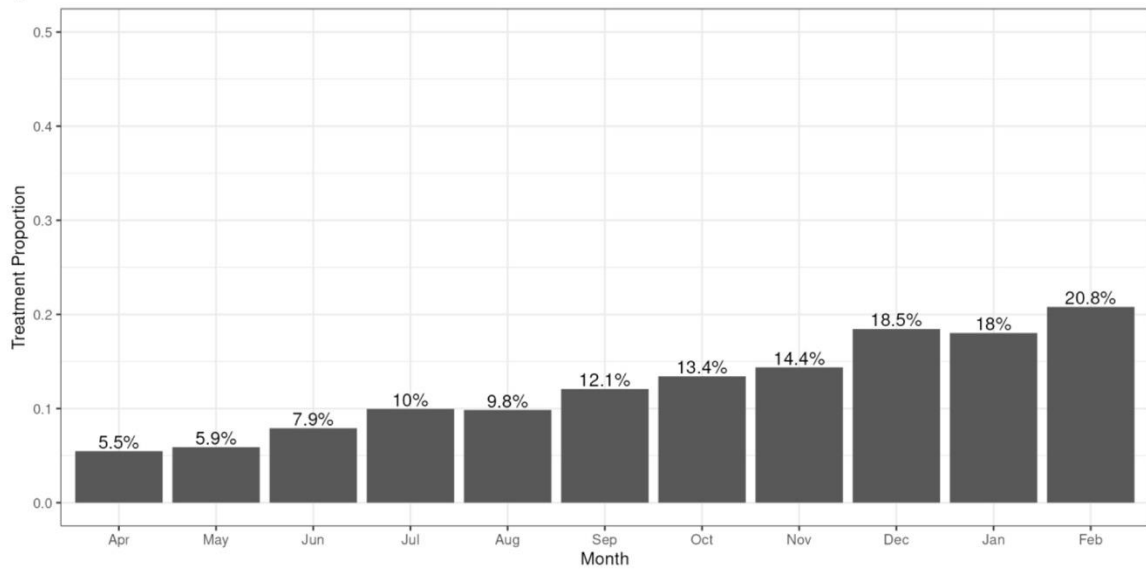

eFigure 2. Proportions of Patients Receiving Treatments Over Time

**A Nirmatrelvir**

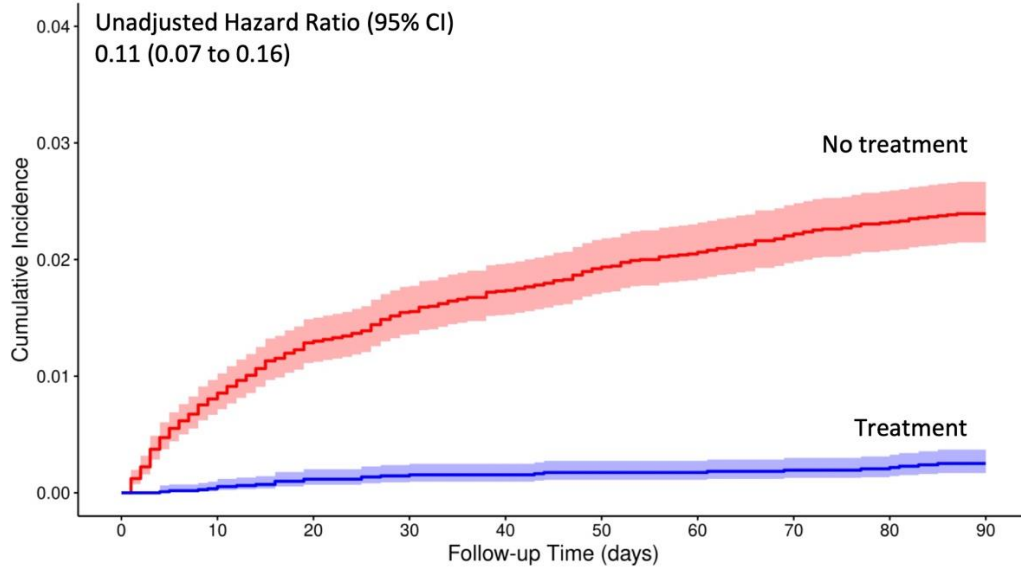

**No. at Risk**

**(Cumulative No. of Events)**

|              |        |        |        |        |        |        |        |        |        |        |
|--------------|--------|--------|--------|--------|--------|--------|--------|--------|--------|--------|
| No Treatment | 13,934 | 13,733 | 13,386 | 13,114 | 12,858 | 12,566 | 12,152 | 11,693 | 11,214 | 10,760 |
|              | (0)    | (119)  | (180)  | (214)  | (238)  | (264)  | (280)  | (299)  | (311)  | (319)  |
| Treatment    | 11,303 | 11,186 | 10,866 | 10,614 | 10,407 | 10,164 | 9,865  | 9,344  | 8,856  | 8,422  |
|              | (0)    | (6)    | (13)   | (17)   | (17)   | (19)   | (19)   | (21)   | (23)   | (26)   |

**B Molnupiravir**

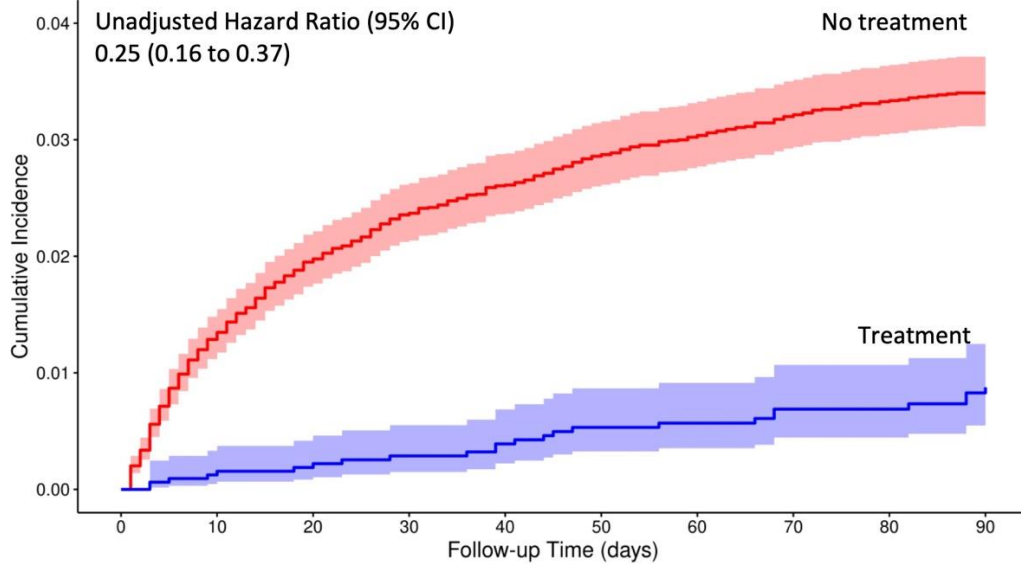

**No. at Risk**

**(Cumulative No. of Events)**

|              |        |        |        |        |        |        |        |        |        |        |
|--------------|--------|--------|--------|--------|--------|--------|--------|--------|--------|--------|
| No Treatment | 14,857 | 14,566 | 14,165 | 13,851 | 13,565 | 13,245 | 12,796 | 12,299 | 11,785 | 11,300 |
|              | (0)    | (200)  | (292)  | (348)  | (382)  | (418)  | (440)  | (463)  | (478)  | (486)  |
| Treatment    | 3,226  | 3,178  | 3,055  | 2,961  | 2,869  | 2,776  | 2,638  | 2,415  | 2,231  | 2,063  |
|              | (0)    | (5)    | (7)    | (9)    | (12)   | (16)   | (17)   | (20)   | (20)   | (24)   |

**eFigure 3. Cumulative Incidence of Death After Omicron Infection by Treatments for Patients 65 Years of Age or Older.**

**A Nirmatrelvir**

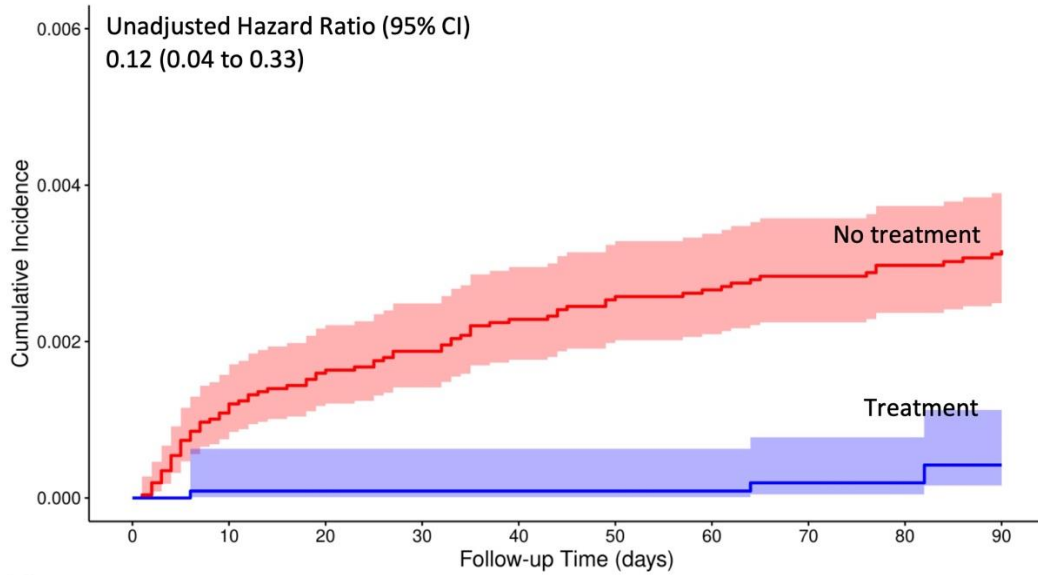

**No. at Risk**

**(Cumulative No. of Events)**

|              |        |        |        |        |        |        |        |        |        |        |
|--------------|--------|--------|--------|--------|--------|--------|--------|--------|--------|--------|
| No Treatment | 25,796 | 25,666 | 25,165 | 24,675 | 24,256 | 23,769 | 23,132 | 22,236 | 21,324 | 20,413 |
|              | (0)    | (31)   | (42)   | (48)   | (58)   | (65)   | (67)   | (71)   | (74)   | (78)   |
| Treatment    | 11,291 | 11,210 | 10,883 | 10,561 | 10,344 | 10,127 | 9,837  | 9,342  | 8,849  | 8,412  |
|              | (0)    | (1)    | (1)    | (1)    | (1)    | (1)    | (1)    | (2)    | (2)    | (4)    |

**B Molnupiravir**

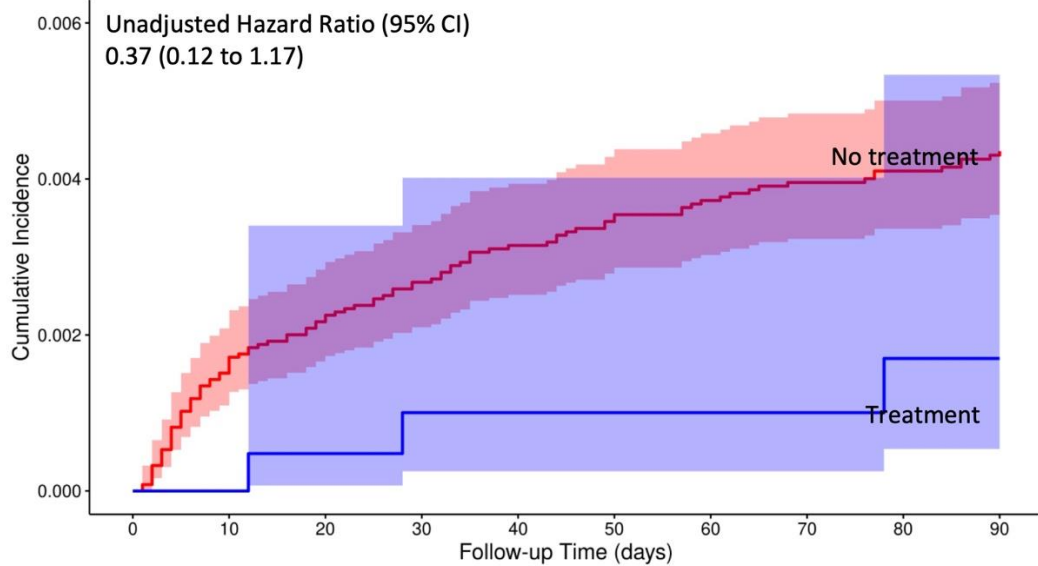

**No. at Risk**

**(Cumulative No. of Events)**

|              |        |        |        |        |        |        |        |        |        |        |
|--------------|--------|--------|--------|--------|--------|--------|--------|--------|--------|--------|
| No Treatment | 24,494 | 24,457 | 23,873 | 23,401 | 23,002 | 22,523 | 21,902 | 21,029 | 20,160 | 19,296 |
|              | (0)    | (42)   | (55)   | (65)   | (76)   | (85)   | (89)   | (94)   | (97)   | (102)  |
| Treatment    | 2,085  | 2,085  | 1,966  | 1,886  | 1,823  | 1,754  | 1,689  | 1,546  | 1,422  | 1,316  |
|              | (0)    | (0)    | (1)    | (2)    | (2)    | (2)    | (2)    | (2)    | (3)    | (3)    |

**eFigure 4. Cumulative Incidence of Death After Omicron Infection by Treatments for Patients Less Than 65 Years of Age.**

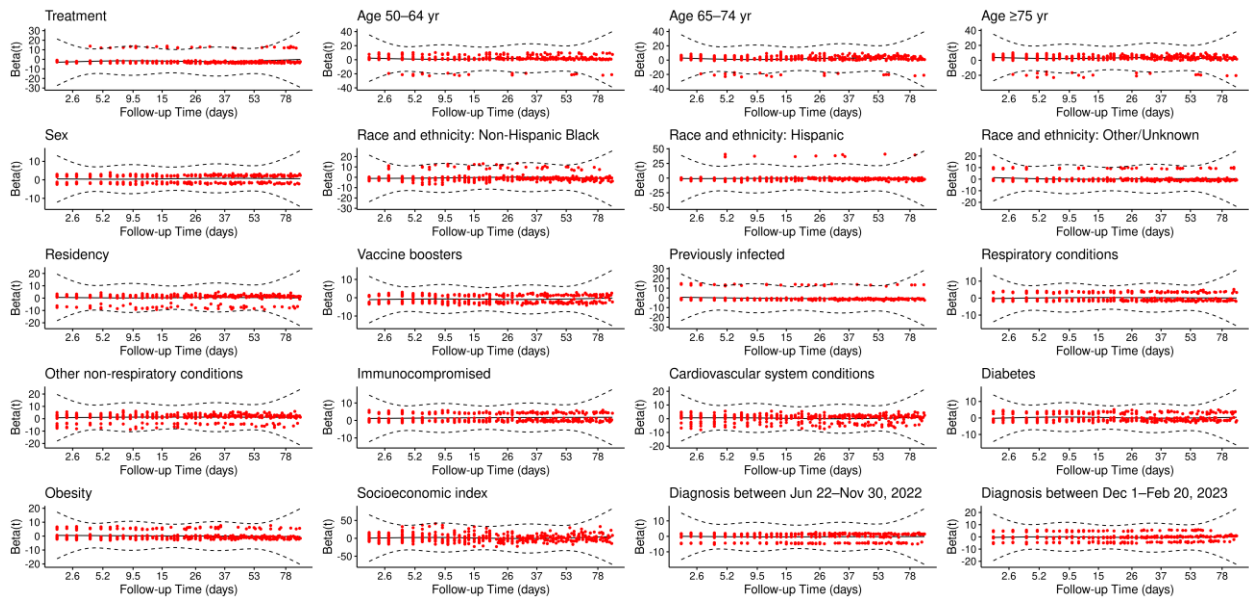

**eFigure 5. Estimates of Time-Varying Hazard Ratios for Time to Death in the Cox Regression Analysis of Nirmatrelvir Treatment.**

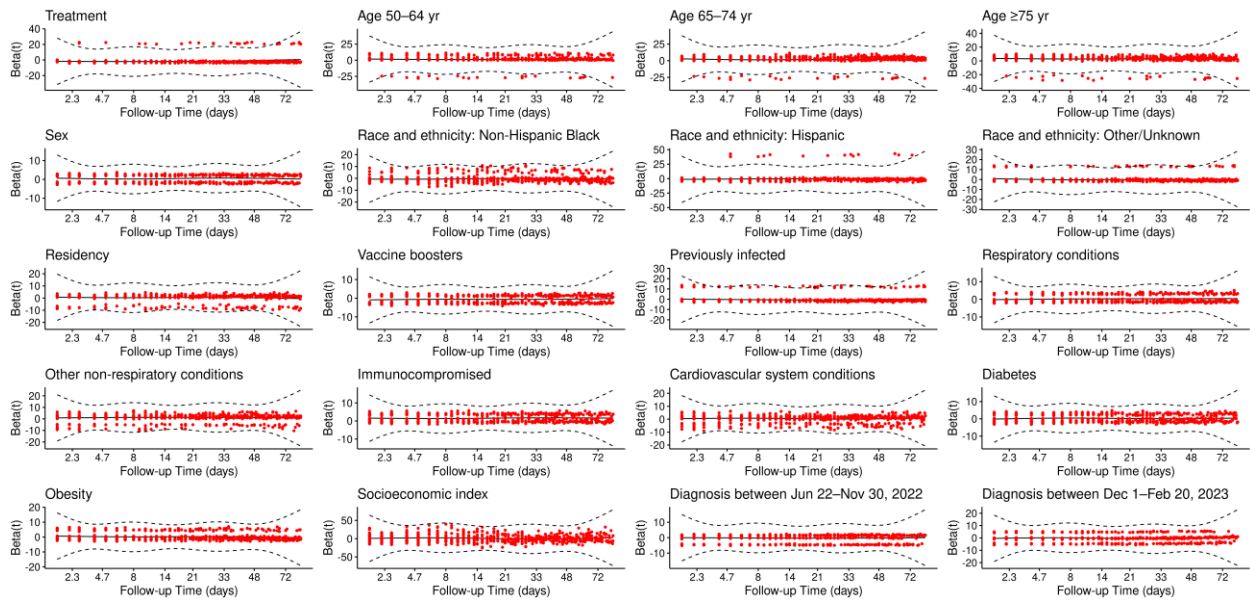

**eFigure 6. Estimates of Time-Varying Hazard Ratios for Time to Death in the Cox Regression Analysis of Molnupiravir Treatment.**

**eTable 1. ICD-10 Codes for the Underlying Conditions of Covid-19 Patients at High Risk of Progressing to Severe Disease.**

| Conditions                                                  | ICD-10 diagnosis code |
|-------------------------------------------------------------|-----------------------|
| Overweight (BMI>30) and obesity                             | E66                   |
| Diabetes mellitus                                           | E08-E13               |
| Pregnancy, childbirth and the puerperium                    | O00-O9A               |
| Glomerular diseases                                         | N00-N08               |
| Renal tubulo-interstitial diseases                          | N10-N16               |
| Acute kidney failure and chronic kidney disease             | N17-N19               |
| Diseases of the circulatory system                          | I00-I99               |
| Diseases of the respiratory system                          | J40-J99               |
| Sickle-cell disorders                                       | D57                   |
| Diseases of the nervous system                              | G00-G99               |
| Congenital malformations of the nervous system              | Q00-Q07               |
| Artificial opening status                                   | Z93                   |
| Neutropenia                                                 | D70                   |
| Functional disorders of polymorphonuclear neutrophils       | D71                   |
| Certain disorders involving the immune mechanism            | D80-D89               |
| Long term (current) use of systemic steroids                | Z79.52                |
| Human immunodeficiency virus [HIV] disease                  | B20                   |
| Autoinflammatory syndromes                                  | M04-M04               |
| Inflammatory polyarthropathies                              | M05-M14               |
| Systemic connective tissue disorders                        | M30-M36               |
| Myositis                                                    | M60                   |
| Ankylosing spondylitis                                      | M45                   |
| Other inflammatory spondylopathies                          | M46                   |
| Lupus erythematosus                                         | L93                   |
| Other localized connective tissue disorders                 | L94                   |
| Vasculitis limited to skin, not elsewhere classified        | L95                   |
| Neoplasms                                                   | C00-D49               |
| Encounter for antineoplastic radiation therapy              | Z51.0                 |
| Encounter for antineoplastic chemotherapy and immunotherapy | Z51.1                 |
| Encounter for antineoplastic chemotherapy                   | Z51.11                |
| Encounter for antineoplastic immunotherapy                  | Z51.12                |



**eTable 2. Categories of Comorbidities for Covid-19 Patients.<sup>a</sup>**

|                                                 |                                                                                                                                                                                                                                                                                                                                                                                                        |
|-------------------------------------------------|--------------------------------------------------------------------------------------------------------------------------------------------------------------------------------------------------------------------------------------------------------------------------------------------------------------------------------------------------------------------------------------------------------|
| <b>Respiratory conditions</b>                   | Chronic pulmonary disease<br>Pulmonary circulation disease                                                                                                                                                                                                                                                                                                                                             |
| <b>Immunocompromised conditions<sup>b</sup></b> | Human immunodeficiency virus<br>Pneumocystosis<br>Malignant neoplasm associated with transplanted organ<br>Other malignant immunoproliferative diseases                                                                                                                                                                                                                                                |
| <b>Cardiovascular system conditions</b>         | Congestive heart failure<br>Valvular disease<br>Peripheral vascular disease<br>Hypertensive disease<br>Ischemic heart disease<br>Cerebrovascular disease                                                                                                                                                                                                                                               |
| <b>Diabetes conditions</b>                      | Diabetes without chronic complications<br>Diabetes with chronic complications                                                                                                                                                                                                                                                                                                                          |
| <b>Obesity conditions</b>                       | Obesity                                                                                                                                                                                                                                                                                                                                                                                                |
| <b>Other non-respiratory conditions</b>         | Paralysis<br>Other neurological disorders<br>Hypothyroidism<br>Renal failure<br>Liver disease<br>Peptic ulcer Disease x bleeding<br>Lymphoma<br>Metastatic cancer<br>Solid tumor w/out metastasis<br>Rheumatoid arthritis/collagen vas<br>Coagulopathy<br>Fluid and electrolyte disorders<br>Chronic blood loss anemia<br>Deficiency Anemias<br>Alcohol abuse<br>Drug abuse<br>Psychoses<br>Depression |

a. The Elixhauser Comorbidity Software, Version 3.7 was used to extract the comorbidity variables. The comorbidity was based on diagnosis within 30 days of the COVID diagnosis date and followed the definition from “The AHRQ Elixhauser Comorbidity index. Med Care. 2017 Jul; 55(7):698-705”. The definitions and ICD-10 codes of the comorbidity variables can be found at <https://www.hcup-us.ahrq.gov/toolssoftware/comorbidity/comorbidity.jsp>

b. The full list of immunocompromised states is available at [https://www.qualityindicators.ahrq.gov/Downloads/Modules/PSI/V60-ICD10/TechSpecs/PSI\\_Appendix\\_1.pdf](https://www.qualityindicators.ahrq.gov/Downloads/Modules/PSI/V60-ICD10/TechSpecs/PSI_Appendix_1.pdf)

**eTable 3. Differences of Demographic and Clinical Characteristics Between Treated and Untreated Patients**

| Variable                       | Mean Difference (95% CI) |                           |
|--------------------------------|--------------------------|---------------------------|
|                                | Nirmatrelvir             | Molnupiravir              |
| Age                            | 7.86 (7.59 to 8.14)      | 9.99 (9.56 to 10.43)      |
| Female sex (%)                 | -3.09 (-3.88 to -2.29)   | -9.45 (-10.89 to -8.01)   |
| Race and ethnicity (%)         |                          |                           |
| Hispanic                       | -2.32 (-2.69 to -1.96)   | -3.03 (-3.58 to -2.48)    |
| non-Hispanic Black             | -8.95 (-9.44 to -8.46)   | -10.13 (-10.88 to -9.38)  |
| Non-Hispanic White             | 12.87 (12.19 to 13.55)   | 15.13 (14.05 to 16.21)    |
| Ohio residency (%)             | 0.39 (-0.17 to 0.95)     | 1.44 (0.47 to 2.41)       |
| SARS-CoV-2 immunity status (%) |                          |                           |
| Vaccine boosters               | 25.27 (24.52 to 26.02)   | 27.51 (26.29 to 28.73)    |
| Previously infected            | -4.88 (-5.36 to -4.39)   | -4.40 (-5.23 to -3.58)    |
| Coexisting conditions (%)      |                          |                           |
| Respiratory                    | -1.52 (-2.16 to -0.89)   | 3.83 (2.61 to 5.04)       |
| Immunocompromised              | 0.17 (-0.22 to 0.55)     | 10.73 (9.66 to 11.81)     |
| Cardiovascular system          | 4.89 (4.08 to 5.69)      | 17.53 (16.10 to 18.96)    |
| Diabetes                       | 1.06 (0.49 to 1.63)      | 7.97 (6.78 to 9.17)       |
| Obesity                        | 0.17 (-0.41 to 0.75)     | 2.43 (1.35 to 3.50)       |
| Other non-respiratory          | -0.26 (-1.08 to 0.55)    | 11.99 (10.57 to 13.41)    |
| Socioeconomic index            | -0.03 (-0.03 to -0.03)   | -0.03 (-0.03 to -0.03)    |
| Covid-19 diagnosis (%)         |                          |                           |
| Apr 1– Jun 21, 2022            | -7.48 (-8.13 to -6.83)   | -11.60 (-12.59 to -10.61) |
| Jun 22 – Nov 30, 2022          | 2.90 (2.09 to 3.71)      | -3.16 (-4.60 to -1.71)    |

**eTable 4. Kaplan-Meier Estimates and 95% Confidence Intervals for the Cumulative Incidence of Death After Covid-19 Diagnosis**

|                     | 30 Days         |                | 60 Days         |                | 90 Days        |                |
|---------------------|-----------------|----------------|-----------------|----------------|----------------|----------------|
|                     | Treatment       | No Treatment   | Treatment       | No treatment   | Treatment      | No treatment   |
| <b>Nirmatrelvir</b> |                 |                |                 |                |                |                |
| All Patients        | 0.08%           | 0.67%          | 0.09%           | 0.90%          | 0.15%          | 1.05%          |
|                     | (0.05 to 0.13)  | (0.59 to 0.75) | (0.06 to 0.14)  | (0.81 to 0.99) | (0.10 to 0.21) | (0.95 to 1.15) |
| ≥65 yrs             | 0.15%           | 1.57%          | 0.17%           | 2.08%          | 0.25%          | 2.42%          |
|                     | (0.10 to 0.25)  | (1.36 to 1.77) | (0.11 to 0.27)  | (1.84 to 2.32) | (0.17 to 0.37) | (1.15 to 2.67) |
| <65 yrs             | 0.01%           | 0.19%          | 0.01%           | 0.27%          | 0.04%          | 0.32%          |
|                     | (0.001 to 0.06) | (0.14 to 0.25) | (0.008 to 0.06) | (0.21 to 0.34) | (0.02 to 0.11) | (0.25 to 0.40) |
| <b>Molnupiravir</b> |                 |                |                 |                |                |                |
| All Patients        | 0.21%           | 1.07%          | 0.39%           | 1.39%          | 0.60%          | 1.57%          |
|                     | (0.12 to 0.39)  | (0.96 to 1.17) | (0.25 to 0.61)  | (1.26 to 1.50) | (0.41 to 0.88) | (1.43 to 1.68) |
| ≥65 yrs             | 0.29%           | 2.40%          | 0.57%           | 3.08%          | 0.88%          | 3.46%          |
|                     | (0.15 to 0.55)  | (2.14 to 2.63) | (0.35 to 0.91)  | (2.77 to 3.33) | (0.59 to 1.31) | (3.12 to 3.71) |
| <65 yrs             | 0.10%           | 0.27%          | 0.10%           | 0.37%          | 0.17%          | 0.44%          |
|                     | (0.03 to 0.40)  | (0.21 to 0.34) | (0.03 to 0.40)  | (0.30 to 0.46) | (0.05 to 0.54) | (0.36 to 0.53) |

**eTable 5. Adjusted Hazard Ratios of Hospitalization or Death After Omicron Infection for Treatments and Confounding Variables**

| Variable                   | Hazard Ratio (95% CI)      |                            |
|----------------------------|----------------------------|----------------------------|
|                            | Nirmatrelvir<br>(N=62,324) | Molnupiravir<br>(N=44,662) |
| Treatment                  | 0.63 (0.59 to 0.68)        | 0.59 (0.53 to 0.66)        |
| Age group                  |                            |                            |
| 50–64 yr                   | 1.10 (1.01 to 1.20)        | 1.20 (1.09 to 1.32)        |
| 65–74 yr                   | 1.20 (1.10 to 1.31)        | 1.39 (1.26 to 1.53)        |
| ≥75 yr                     | 1.54 (1.40 to 1.68)        | 1.78 (1.62 to 1.96)        |
| Male sex                   | 0.99 (0.93 to 1.05)        | 1.06 (1.00 to 1.13)        |
| Race and ethnicity         |                            |                            |
| Hispanic                   | 0.86 (0.74 to 1.00)        | 0.88 (0.76 to 1.03)        |
| Black, non-Hispanic        | 0.87 (0.79 to 0.95)        | 0.89 (0.81 to 0.98)        |
| Other/Unknown              | 1.04 (0.93 to 1.17)        | 1.01 (0.89 to 1.14)        |
| Ohio residency             | 1.62 (1.46 to 1.81)        | 1.41 (1.28 to 1.57)        |
| SARS-CoV-2 immunity status |                            |                            |
| Vaccine boosters           | 0.82 (0.77 to 0.87)        | 0.79 (0.74 to 0.84)        |
| Previously infected        | 0.95 (0.87 to 1.04)        | 0.96 (0.87 to 1.05)        |
| Coexisting conditions      |                            |                            |
| Respiratory                | 1.38 (1.29 to 1.47)        | 1.32 (1.23 to 1.41)        |
| Immunocompromised          | 2.24 (2.07 to 2.43)        | 2.39 (2.22 to 2.57)        |
| Cardiovascular system      | 1.57 (1.47 to 1.69)        | 1.65 (1.53 to 1.78)        |
| Diabetes                   | 1.12 (1.04 to 1.20)        | 1.10 (1.03 to 1.19)        |
| Obesity                    | 1.44 (1.34 to 1.54)        | 1.44 (1.34 to 1.55)        |
| Other non-respiratory      | 2.42 (2.26 to 2.59)        | 2.52 (2.33 to 2.73)        |
| Socioeconomic index        | 0.54 (0.40 to 0.74)        | 0.64 (0.47 to 0.88)        |
| Covid-19 diagnosis         |                            |                            |
| Jun 22 – Nov 30, 2022      | 1.06 (0.98 to 1.14)        | 1.09 (1.00 to 1.18)        |
| Dec 1– Feb 20, 2023        | 1.21 (1.11 to 1.32)        | 1.24 (1.13 to 1.36)        |

**eTable 6. Adjusted Hazard Ratios of Hospitalization or Death After Omicron Infection for Treatments by Subgroup.**

|                                        | Nirmatrelvir  |                          | Molnupiravir  |                          |
|----------------------------------------|---------------|--------------------------|---------------|--------------------------|
|                                        | No. treated/N | Hazard Ratio<br>(95% CI) | No. treated/N | Hazard Ratio<br>(95% CI) |
| <b>Age</b>                             |               |                          |               |                          |
| 12–64 yr                               | 11,291/37,087 | 0.67 (0.61 to 0.75)      | 2,085/26,579  | 0.58 (0.48 to 0.70)      |
| ≥65 yr                                 | 11,303/25,237 | 0.60 (0.55 to 0.66)      | 3,226/18,083  | 0.60 (0.53 to 0.68)      |
| <b>Race and ethnicity</b>              |               |                          |               |                          |
| Non-Hispanic White                     | 18,571/46,113 | 0.63 (0.59 to 0.68)      | 4,499/31,878  | 0.60 (0.54 to 0.67)      |
| Others                                 | 4,023/16,211  | 0.61 (0.52 to 0.73)      | 812/12,784    | 0.54 (0.41 to 0.71)      |
| <b>Vaccine boosters</b>                |               |                          |               |                          |
| Yes                                    | 16,966/36,761 | 0.63 (0.58 to 0.69)      | 4,162/24,174  | 0.59 (0.52 to 0.66)      |
| No                                     | 5,628/25,563  | 0.58 (0.51 to 0.66)      | 1,149/20,488  | 0.56 (0.45 to 0.71)      |
| <b>Previous infection</b>              |               |                          |               |                          |
| Yes                                    | 1,816/6,947   | 0.70 (0.56 to 0.86)      | 444/5,467     | 0.75 (0.55 to 1.02)      |
| No                                     | 20,778/55,377 | 0.63 (0.58 to 0.67)      | 4,867/39,195  | 0.57 (0.51 to 0.64)      |
| <b>Respiratory disorders</b>           |               |                          |               |                          |
| Yes                                    | 3,994/11,623  | 0.71 (0.62 to 0.80)      | 1,242/8,938   | 0.63 (0.53 to 0.76)      |
| No                                     | 18,600/50,701 | 0.60 (0.56 to 0.66)      | 4,069/35,724  | 0.57 (0.50 to 0.65)      |
| <b>Immunocompromised disorders</b>     |               |                          |               |                          |
| Yes                                    | 1,339/3,627   | 0.54 (0.45 to 0.66)      | 960/3,849     | 0.48 (0.39 to 0.58)      |
| No                                     | 21,255/58,697 | 0.65 (0.60 to 0.70)      | 4,351/40,813  | 0.66 (0.58 to 0.75)      |
| <b>Cardiovascular system disorders</b> |               |                          |               |                          |
| Yes                                    | 9,472/24,187  | 0.60 (0.55 to 0.66)      | 3,045/18,708  | 0.56 (0.50 to 0.64)      |
| No                                     | 13,122/38,137 | 0.69 (0.62 to 0.78)      | 2,266/25,954  | 0.71 (0.57 to 0.87)      |
| <b>Diabetes</b>                        |               |                          |               |                          |
| Yes                                    | 3,263/8,579   | 0.65 (0.57 to 0.76)      | 1,215/7,080   | 0.52 (0.43 to 0.63)      |
| No                                     | 19,331/53,745 | 0.63 (0.58 to 0.68)      | 4,096/37,582  | 0.63 (0.55 to 0.71)      |
| <b>Obesity</b>                         |               |                          |               |                          |
| Yes                                    | 3,255/8,911   | 0.56 (0.48 to 0.64)      | 901/6,622     | 0.54 (0.43 to 0.66)      |
| No                                     | 19,339/53,413 | 0.66 (0.60 to 0.71)      | 4,410/38,040  | 0.61 (0.54 to 0.69)      |
| <b>Other non-respiratory disorders</b> |               |                          |               |                          |
| Yes                                    | 10,200/28,240 | 0.62 (0.57 to 0.67)      | 3,143/21,713  | 0.56 (0.50 to 0.63)      |
| No                                     | 12,394/34,084 | 0.68 (0.59 to 0.77)      | 2,168/22,949  | 0.76 (0.60 to 0.96)      |
| <b>Covid-19 diagnosis</b>              |               |                          |               |                          |
| Apr 1– Jun 21, 2022                    | 3,762/13,349  | 0.66 (0.56 to 0.78)      | 649/10,023    | 0.62 (0.46 to 0.83)      |
| Jun 22 – Nov 30, 2022                  | 13,190/35,231 | 0.65 (0.60 to 0.71)      | 2,778/24,603  | 0.59 (0.51 to 0.68)      |
| Dec 1– Feb 20, 2023                    | 5,642/13,744  | 0.57 (0.49 to 0.65)      | 1,884/10,036  | 0.57 (0.47 to 0.68)      |
