# Supplementary material for: Nirmatrelvir or Molnupiravir Use and Severe Outcomes From Omicron Infections
Source: PubMed Central journal article supplement (PMC10514733; doi:10.1001/jamanetworkopen.2023.35077), 2023-09-21
Supplement: jamanetwopen-e2335077-s002.pdf [file jamanetwopen-e2335077-s002.pdf]

## Data Sharing Statement

Lin. Nirmatrelvir or Molnupiravir Use and Severe Outcomes From Omicron Infections. *JAMA Netw Open*. Published September 21, 2023. doi:10.1001/jamanetworkopen.2023.35077

### Data

**Data available:** No

### Additional Information

**Explanation for why data not available:** Patient data cannot be shared with third parties per institutional policies.
